# Supplementary material for: The median effective concentration of ropivacaine for ultrasound-guided anterior iliopsoas muscle space block in the elderly undergoing hip surgery: a dose-finding study
Source: PeerJ. 2024 Aug 28;12:e17970. doi: 10.7717/peerj.17970 (PMC11365473; doi:10.7717/peerj.17970)
Supplement: Supplemental Information 2 [file peerj-12-17970-s002.xlsx]

## Sheet: Sheet1
Number	concentration（%）	positive	negative	sex	age（yr）	BMI（kg/m2）	ASA	duration of surgery（min）	VAS at 6h after the block time in rest	VAS at 6h after the block time in movement	VAS at 12h after the block time in rest	VAS at 12h after the block time in movement	VAS at 24h after the block time in rest	VAS at 24h after the block time in movement	remedial analgesia （times）
1	0.2	P		female	65	23.8	Ⅱ	85	0	0	5	7	2	3	0
2	0.15		P	female	87	23.4	Ⅱ	80	0	0	6	6	3	3	0
3	0.2		P	male	80	23.1	Ⅱ	60	2	2	5	6	1	2	0
4	0.25		P	male	65	26	Ⅱ	110	0	0	4	4	1	2	0
5	0.3		P	female	87	22	Ⅲ	57	0	1	3	5	1	2	0
6	0.35	P		male	68	25	Ⅱ	80	1	2	8	8	1	2	2
7	0.3		P	female	68	24	Ⅲ	103	2	3	5	5	1	2	0
8	0.35	P		male	69	22.5	Ⅱ	66	0	1	6	6	1	2	0
9	0.3		P	male	77	23	Ⅱ	67	0	0	2	3	1	3	0
10	0.35	P		male	76	24	Ⅲ	93	0	0	6	8	1	3	2
11	0.3	P		male	73	26	Ⅲ	72	1	1	5	5	1	1	0
12	0.25	P		female	74	23	Ⅲ	85	0	2	2	4	2	3	0
13	0.2		P	male	86	22	Ⅲ	65	0	2	5	5	1	1	0
14	0.25		P	female	75	24	Ⅱ	70	0	2	7	8	0	2	1
15	0.3	P		male	70	25	Ⅲ	55	0	1	4	5	3	4	0
16	0.25		P	female	67	21	Ⅲ	85	1	1	3	3	0	2	0
17	0.3		P	female	69	23	Ⅱ	60	0	1	6	6	0	2	0
18	0.35	P		female	81	19.8	Ⅱ	90	0	0	5	5	2	2	0
19	0.3	P		female	79	20.2	Ⅲ	60	0	0	2	2	0	1	0
20	0.25	P		female	76	19	Ⅲ	80	1	1	3	4	3	3	0
21	0.2		P	male	75	24	Ⅲ	70	0	0	4	6	2	4	0
22	0.25		P	female	79	22	Ⅲ	55	0	2	2	4	1	2	0
23	0.3	P		female	82	21.5	Ⅲ	85	0	2	5	5	1	2	1
24	0.25		P	female	83	21	Ⅲ	75	1	1	4	4	2	2	0
25	0.3	P		male	79	23	Ⅲ	70	0	0	4	4	1	3	0
